# Supplementary material for: Modified Steel Probe Technique for Retrieving Fractured Burs in Third Molar Surgery: A Case Series
Source: Research Square preprint supplement (doi:10.21203/rs.3.rs-7478792/v1), 2025-10-17
Supplement: Supplementary file 1 [file 756547c5fe7450379a56fb08.docx]

| **CARE Checklist (2013) of information to include when writing a case report** | | | |
| --- | --- | --- | --- |
| **Topic** | **Item** | **Checklist item description** | **Reported on page** |
| **Title** | **1** | The words “case report” should be in the title along with what is of greatest interest in this case | Page 1 (Line 2-3) |
| **Key Words** | **2** | The key elements of this case in 2 to 5 key words | Page 2 (Line 43-45) |
| **Abstract** | **3a** | Introduction—What is unique about this case? What does it add to the medical literature? | Page 2 (Line 17-22) |
|  | **3b** | The main symptoms of the patient and the important clinical findings | Page 2 (Line 24-32) |
|  | **3c** | The main diagnoses, therapeutics interventions, and outcomes | Page 2 (Line 32-36) |
|  | **3d** | Conclusion—What are the main “take-away” lessons from this case? | Page 2 (Line 37-42) |
| **Introduction** | **4** | Brief background summary of this case referencing the relevant medical literature | Page 3 (Line 45-48) to Page 4 (Line 69-70) |
| **Patient Information** | **5a** | Demographic information (such as age, gender, ethnicity, occupation) | Case 1: Page 4 (Line 71) Case 2: Page 5 (Line 125) |
|  | **5b** | Main symptoms of the patient (his or her chief complaints) | Case 1: Page 4 (Line 80-82) Case 2: Page 5 (Line 125-128) |
|  | **5c** | Medical, family, and psychosocial history including co-morbidities, and relevant genetic information | Case 1: Page 4 (Line 76) Case 2: Page 5 (Line 126) |
|  | **5d** | Relevant past interventions and their outcomes | Case 1: Page 4 (Line 73-75, 94-102) Case 2: Page 5 (Line 127-131) |
| **Clinical Findings** | **6** | Describe the relevant physical examination (PE) findings | Case 1: Page 4 (Line 80-82, 85) Case 2: Page 5 (Line 128-131) |
| **Timeline** | **7** | Depict important milestones related to your diagnoses and interventions (table or figure) | Case 1: Page 5 (Line 103-116, 117-123) Case 2: Page 6 (Line 140-152, 153-154) |
| **Diagnostic Assessment** | **8a** | Diagnostic methods (such as PE, laboratory testing, imaging, questionnaires) | Case 1: Page 4 (Line 85, 87-88) Case 2: Page 5 (Line 132-136) |
|  | **8b** | Diagnostic challenges (such as financial, language, or cultural) | Case 1: Page 4 (Line 84, 89-93) |
|  | **8c** | Diagnostic reasoning including other diagnoses considered | N/A |
|  | **8d** | Prognostic characteristics (such as staging in oncology) where applicable | Case 2: Page 6 (Line 134-136) |
| **Therapeutic Intervention** | **9a** | Types of intervention (such as pharmacologic, surgical, preventive, self-care) | Case 1: Page 5 (Line 105-110) Case 2: Page 6 (Line 140-145) |
|  | **9b** | Administration of intervention (such as dosage, strength, duration) | Case 1: Page 5 (Line 107-110) Case 2: Page 6 (Line 142-145) |
|  | **9c** | Changes in intervention (with rationale) | **Case 1: Page 4 (Line 94-102) & Page 5 (Line 103-116) (**Initial failure -> New plan) |
| **Follow-up and Outcomes** | **10a** | Clinician-assessed outcomes and when appropriate patient-assessed outcomes | Case 1: Page 5 (Line 117-123) Case 2: Page 6 (Line 153-154) |
|  | **10b** | Important follow-up test results | Case 1: Page 5 (Line 121-123) Case 2: Page 6 (Line 153-154) (3-month CBCT implied) |
|  | **10c** | Intervention adherence and tolerability (How was this assessed?) | Page 7 (Line 179-182) |
|  | **10d** | Adverse and unanticipated events | N/A |
| **Discussion** | **11a** | Discussion of the strengths and limitations in the management of this case | Page 7 (Line 182-189); Page 8 (Line 197-204) |
|  | **11b** | Discussion of the relevant medical literature | Page 7 (Line 165-181); Page 8 (Line 190-196, 205-214) |
|  | **11c** | The rationale for conclusions (including assessment of possible causes) | Page 8 (Line 200-206); Page 9 (Line 215-219) |
|  | **11d** | The main “take-away” lessons of this case report | Page 8 (Line 215-219); Page 9 (Line 220-224) |
| **Patient Perspective** | **12** | Did the patient share his or her perspective or experience? (Include when appropriate) | N/A |
| **Informed Consent** | **13** | Did the patient give informed consent? Please provide if requested | Page 9 (Line 247-249) |
